# Supplementary material
Source: Springer Nature journal article supplement (https://www.springermedizin.de/resource/supplementary/12958_2014_1232_MOESM1_ESM.pdf/9567108)

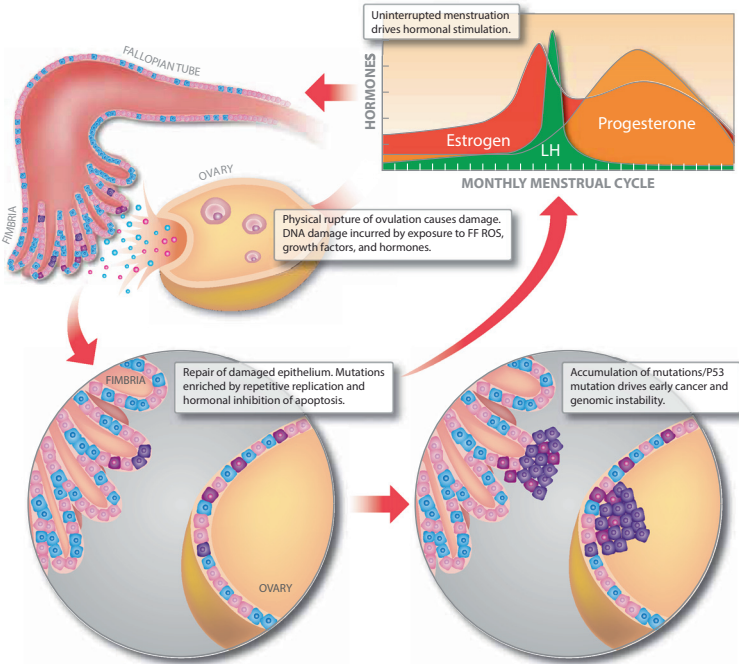

Supplement: MOESM1 [file 9567108]
